# Supplementary material for: A new family of 3d–4f heterometallic coordination polymers assembled with 1H-1,2,3-triazole-4,5-dicarboxylic acid: syntheses, structures and magnetic properties
Source: Royal Society of Chemistry journal article supplement (doi:10.1039/c3ra43118e), 2013-01-01
Supplement: c3ra43118e.pdf [file c3ra43118e.pdf]

# Electronic Supplementary Information

## **A New Family of 3d-4f Heterometallic Coordination Polymers Assembled with 1*H*-1,2,3-Triazole-4,5-Dicarboxylic Acid: Syntheses, Structures and Magnetic Properties**

**Ji-Yong Zou,<sup>[a,b]</sup> Na Xu,<sup>[a]</sup> Wei Shi,<sup>\*,[a]</sup> Hong-Ling Gao,<sup>[b]</sup> Jian-Zhong Cui<sup>[b]</sup> and Peng Cheng<sup>[a]</sup>**

*<sup>[a]</sup>Department of Chemistry, Key Laboratory of Advanced Energy Materials Chemistry (MOE), Tianjin Co-Innovation Center of Chemical Science and Engineering, Nankai University, Tianjin 300071, P. R. China*

*<sup>[b]</sup>Department of Chemistry, Tianjin University, Tianjin 300072, P. R. China*

## 1. Power X-Ray Diffraction

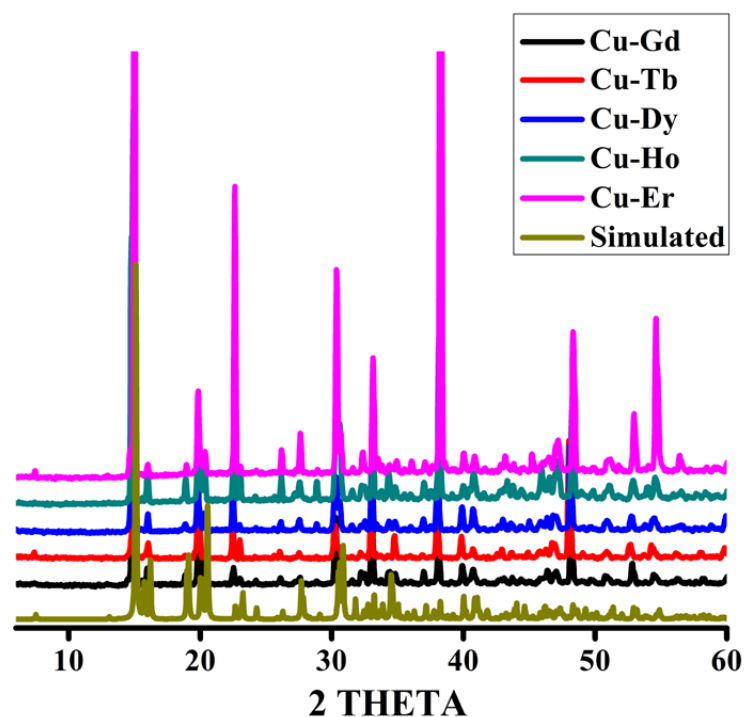

**Fig. S1.** Comparisons of the experimental PXRD patterns of as-synthesized **Cu-Ln** with that simulated from their single crystal data.

## 2. Infrared Spectra

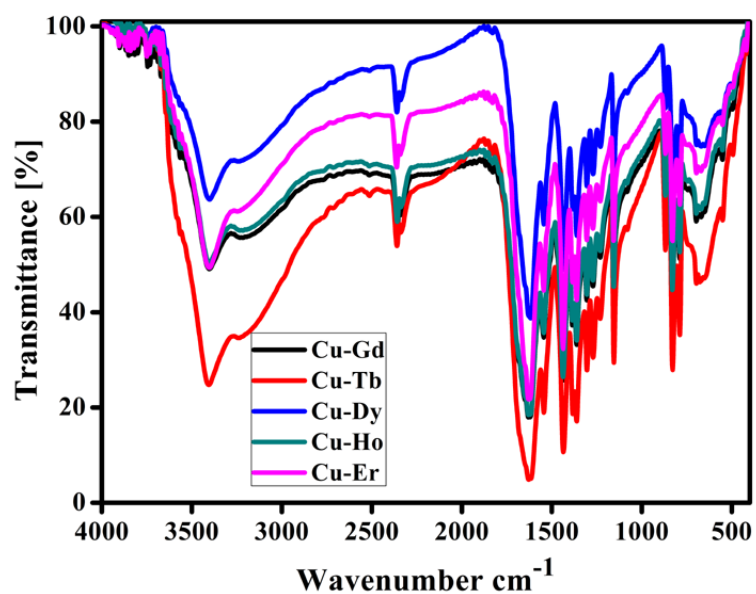

**Fig. S2.** Infrared spectra of **Cu-Ln**.

### 3. Scanning Electron Microscopy

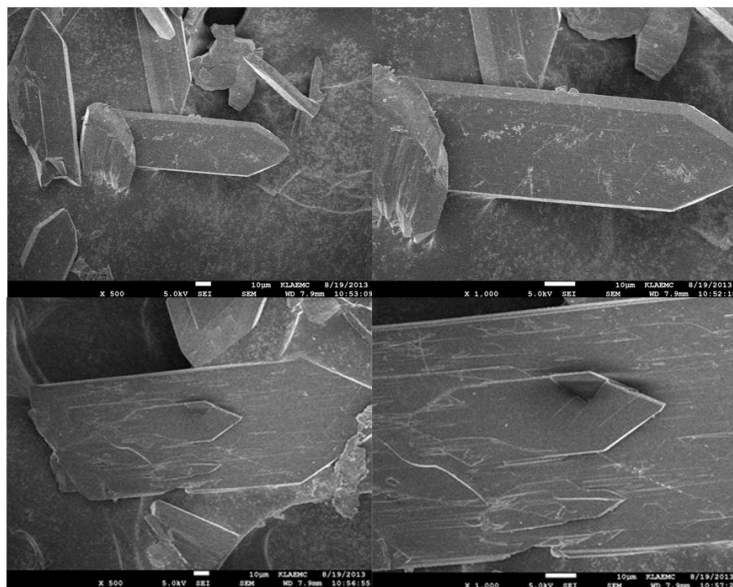

Fig. S3. Optional SEM images of the as-synthesized **Cu-Dy** (up) and **Cu-Tb** (bottom).

### 4. Thermogravimetric Analysis

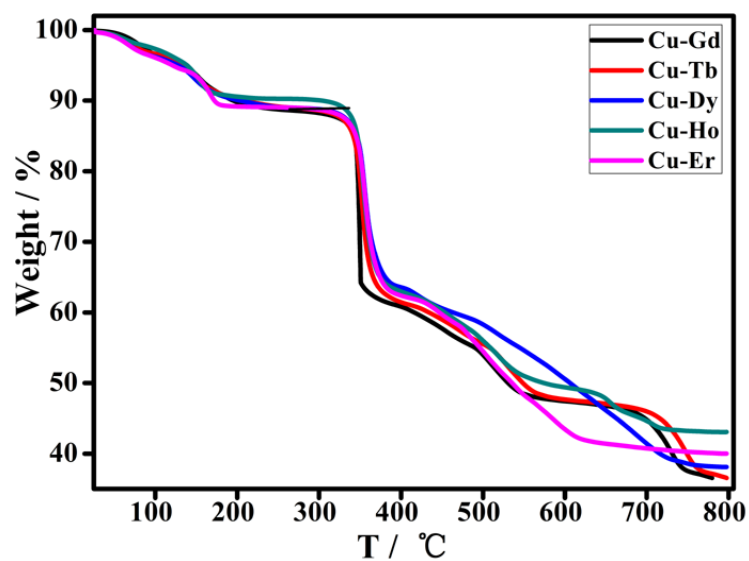

Fig. S4. The thermal gravimetric analysis (TGA) data of **Cu-Ln**.

## 5. Magnetism Measurements

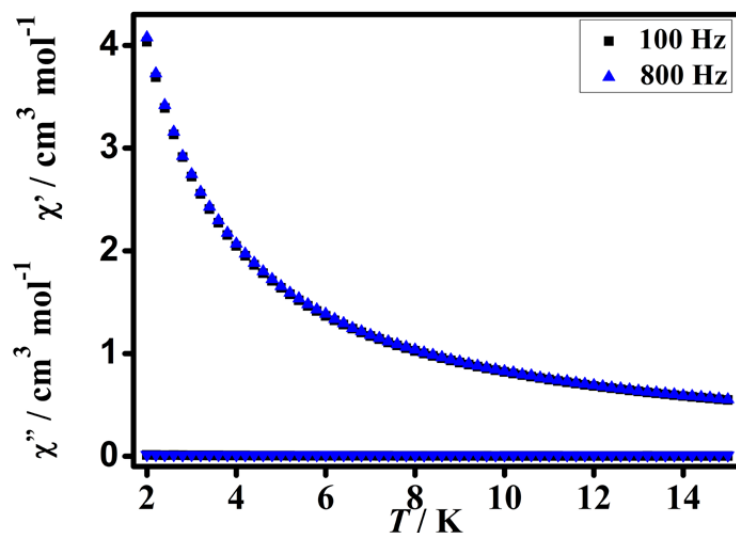

**Fig. S5.** Temperature dependence of the in-phase ( $\chi'$ ) and out-of- phase ( $\chi''$ ) components of ac susceptibilities for Cu-Gd under the indicated frequencies.

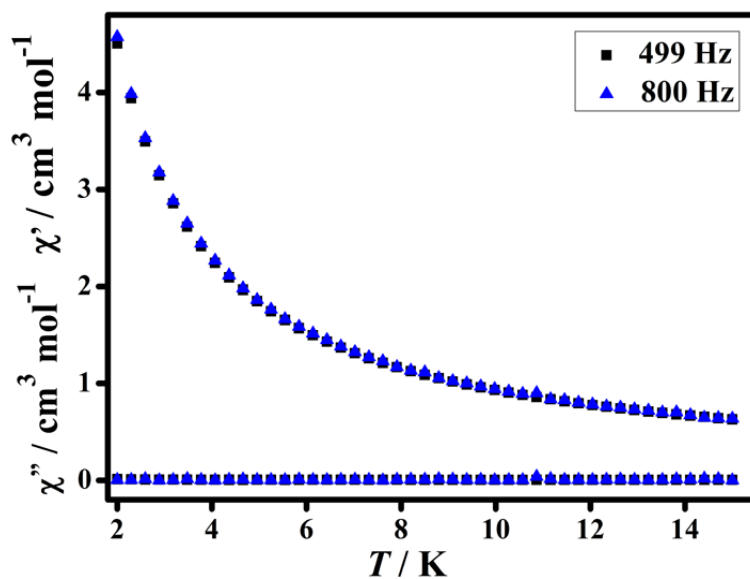

**Fig. S6.** Temperature dependence of the in-phase ( $\chi'$ ) and out-of- phase ( $\chi''$ ) components of ac susceptibilities for Cu-Tb under the indicated frequencies.

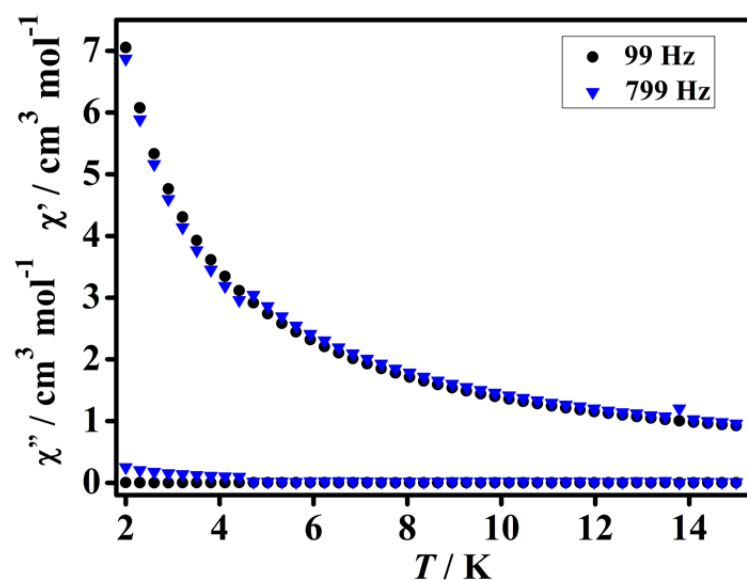

**Fig. S7.** Temperature dependence of the in-phase ( $\chi'$ ) and out-of- phase ( $\chi''$ ) components of ac susceptibilities for Cu-Dy under the indicated frequencies.

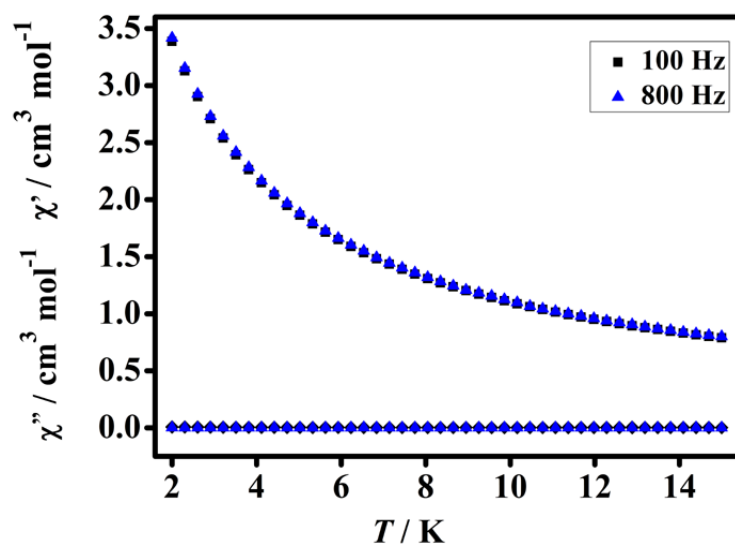

**Fig. S8.** Temperature dependence of the in-phase ( $\chi'$ ) and out-of- phase ( $\chi''$ ) components of ac susceptibilities for Cu-Ho under the indicated frequencies.

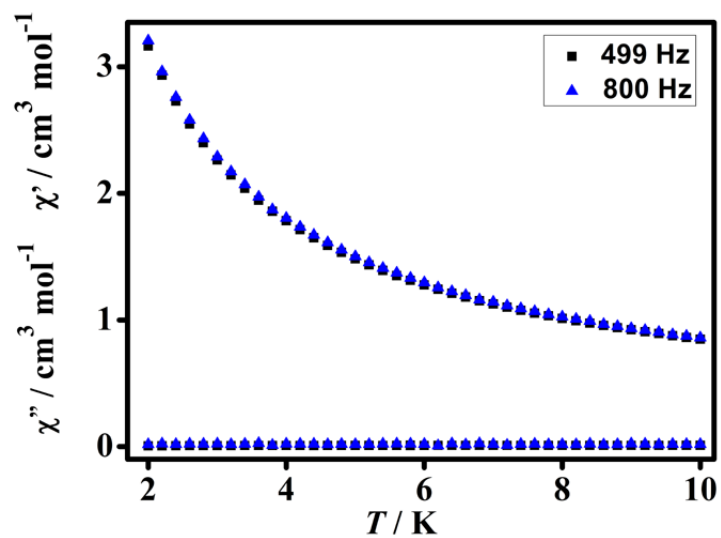

**Fig. S9.** Temperature dependence of the in-phase ( $\chi'$ ) and out-of- phase ( $\chi''$ ) components of ac susceptibilities for **Cu-Er** under the indicated frequencies.
